# Supplementary material for: The Polycomb protein Ezl1 mediates H3K9 and H3K27 methylation to repress transposable elements in Paramecium
Source: PubMed Central journal article supplement (PMC6586856; doi:10.1038/s41467-019-10648-5), 2019-06-20
Supplement: 41467_2019_10648_MOESM1_ESM.pdf [file 41467_2019_10648_MOESM1_ESM.pdf]

## **Supplementary Information**

### **The Polycomb protein Ezl1 mediates H3K9 and H3K27 methylation to repress transposable elements in *Paramecium***

Andrea Frapporti, Caridad Miró Pina, Olivier Arnaiz, Daniel Holoch, Takayuki Kawaguchi, Adeline Humbert, Evangelia Eleftheriou, Bérangère Lombard, Damarys Loew, Linda Sperling, Karine Guitot, Raphaël Margueron and Sandra Duhaucourt

**a**

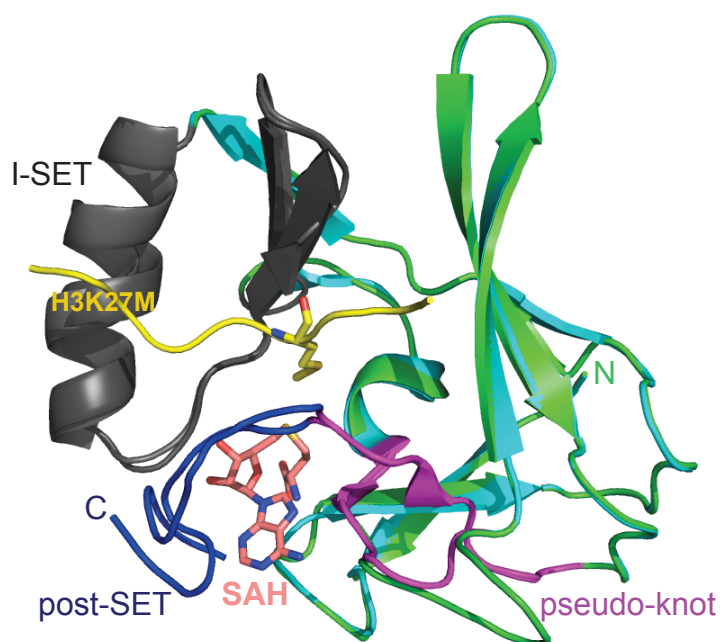

**b**

|      |     | SET         |            |            |            |            |            | I-SET     |            |        |            |       |      |            |        |     |
|------|-----|-------------|------------|------------|------------|------------|------------|-----------|------------|--------|------------|-------|------|------------|--------|-----|
| Ez11 | 442 | MQIRKSLVLG  | KSLICNGLGL | FAAQNFKVCD | FVGEYTGNYI | LLDDE      | SMAIE      | QCDWITNNH | -          | 501    |            |       |      |            |        |     |
| Ezh2 | 608 | RGSKKHILLA  | PSDVA-GWGI | FIKDPVQKNE | FISEYCGE-I | ISQDEADRRG | KVYDKYMCS  | -         |            | 664    |            |       |      |            |        |     |
| Dim5 | 145 | RGRTPVPLQIF | RTKDR-GWGV | KCPVNIKRGQ | FVDRYLGE-I | ITSEEADRRR | AESTIARRKD |           |            | 202    |            |       |      |            |        |     |
|      |     | I-SET       |            | *          | SET        |            |            |           |            |        |            |       |      |            |        |     |
| Ez11 | 502 | -YLF        | VDDK-      | -----      | WQVDG      | TYYSNCLRYI | NHATKKS    | DLA       | NCQAQILFSE | 544    |            |       |      |            |        |     |
| Ezh2 | 665 | -FLFN       | LNND-      | -----      | FVVD       | TRKGNKIRFA | NH         | SVN       | -----      | P      | NCYAKVMMVN | 703   |      |            |        |     |
| Dim5 | 203 | VYLF        | ALDKFS     | DPDSL      | DPLLA      | GQPLE--    | VDG        | EYMSG     | PTRFI      | NH     | SCD        | ----- | P    | NMAIFARVGD | 256    |     |
|      |     | SET         |            |            |            | post-SET   |            |           |            |        |            |       |      |            |        |     |
| Ez11 | 545 | G----       | RWRIA      | MFTTK      | NISIG      | EEL        | FDY        | GD-       | -KFL       | TKW    | LD         | FNK   | LCDD | YYK        | K----- | 589 |
| Ezh2 | 704 | G----       | DHRIG      | IFAK       | RAIQTG     | EEL        | FDY        | ---       | -RYS       | QADAL- | -----      | K     | YVG  | IE----     |        | 740 |
| Dim5 | 257 | HADK        | HIHDLA     | LFAIK      | DIPKG      | TEL        | TFD        | YVNG      | LTGLE      | SDAHD  | PSK        | I     | SEM  | TKC        | LCGTAK | 312 |

**Supplementary Figure 1. Comparative sequence and homology modeling of the catalytic SET domain of *Paramecium tetraurelia* Ez11 and human Ezh2.**

**a** Structural alignment of human Ezh2 SET domain (cyan) (PDB ID: 5HYN) bound to the peptide inhibitor H3K27M (yellow) and to SAH cofactor (pink) with modeled *Paramecium tetraurelia* Ez11 (green). The pseudoknot-like structure, the I-SET domain and the post-SET domain (unaligned) are displayed. **b** Sequence alignment of *P. tetraurelia* Ez11 (PTET.51.1.G1740049) with human Ezh2 (Q15910) and *Neurospora crassa* Dim-5 (AF419248). Substrate and cofactor binding residues are highlighted in yellow and green, respectively. Important residues for catalysis are highlighted in red. Identical residues are colored in grey and positively substituted residues in light grey. Position A677 in Ezh2, which corresponds to a glycine in both Ez11 and Dim-5, is indicated by an asterisk.

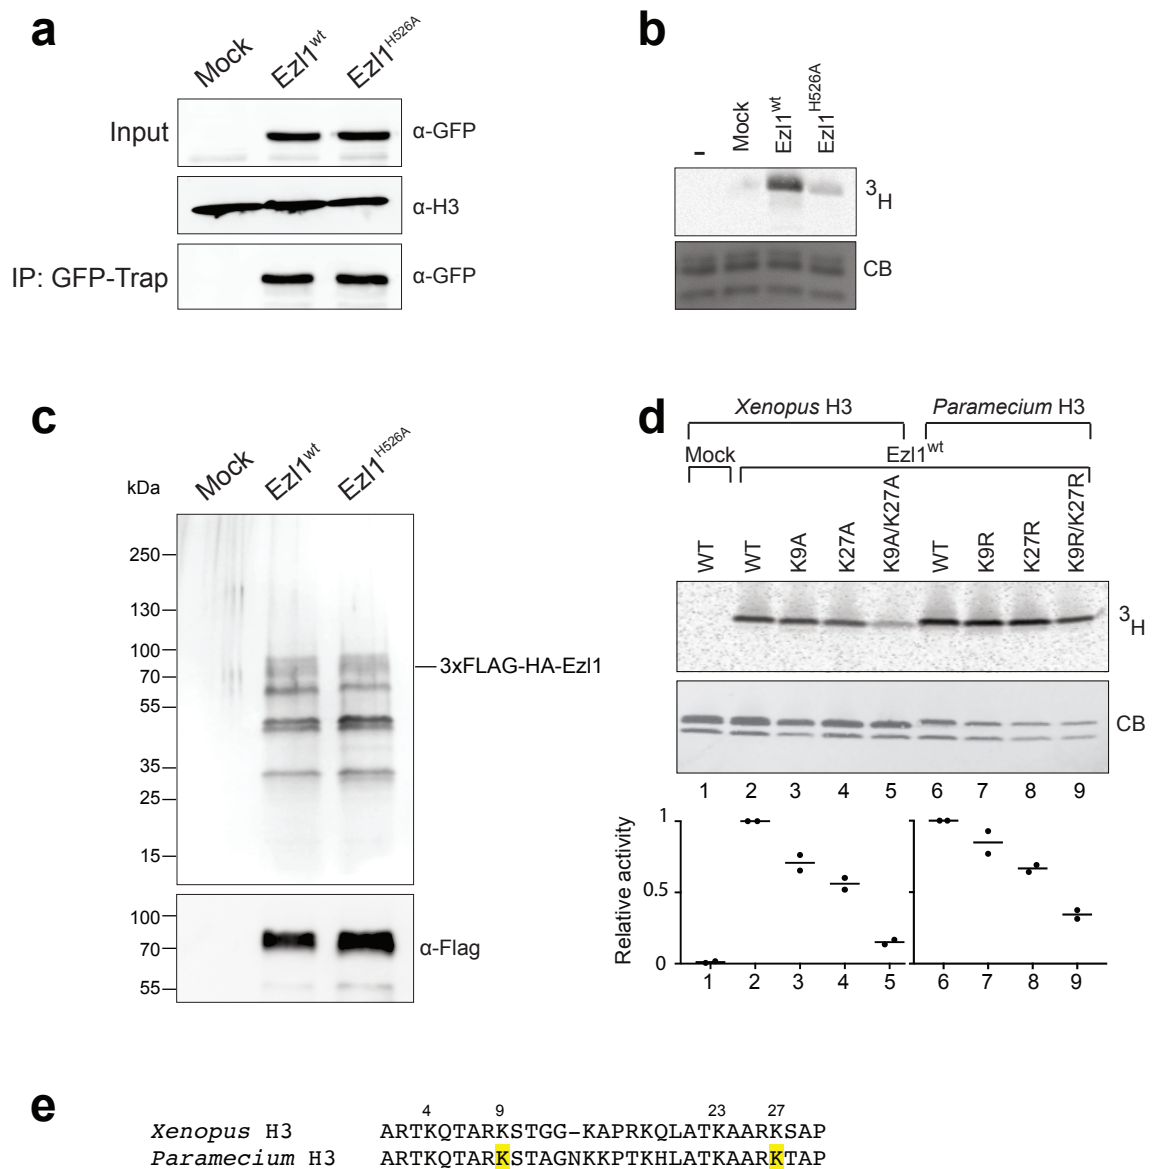

**Supplementary Figure 2. Immunoprecipitations of tagged-Ezl1 fusion proteins from nuclear extracts used for *in vitro* histone methyltransferase assays.**

**a** (Top panels) Western-blot analysis of *Parametrium* nuclear extracts prepared 12 hours after the onset of sexual events in non-injected (mock) cells, cells transformed with *GFP-EZL1<sup>wt</sup>* or *GFP-EZL1<sup>H526A</sup>* RNAi-resistant transgenes upon *EZL1* RNAi, with anti-GFP and anti-H3 antibodies. Anti-H3 antibody shows comparable amounts of nuclear extracts that were used as inputs for immunoprecipitation with GFP-Trap\_M beads. (Bottom panel) Western-blot analysis of GFP-Trap immunoprecipitates used for histone methyltransferase assays (Fig. 2a-c and panel b), with anti-GFP antibodies. **b** Immunoprecipitates from panel a were used for *in vitro* histone methyltransferase reactions with wild type *Xenopus* recombinant histone octamers as substrates and S-adenosyl-[methyl <sup>3</sup>H]-methionine as methyl donor. The same reactions with histone octamers only were performed as a negative control. The reaction products were separated by SDS-PAGE and transferred onto a PVDF membrane. Coomassie stain (CB, bottom panel) shows histones and the autoradiograph (<sup>3</sup>H, top panel) indicates H3 histone methyltransferase activity. **c** Double affinity pull-down of 3xFLAG-HA-Ezl1<sup>wt</sup> or 3xFLAG-HA-Ezl1<sup>H526A</sup> proteins from nuclear extracts prepared 12 hours after the onset of sexual events in non-injected (mock) cells, or transformed *Parametrium* cells, depleted for the endogenous Ezl1 protein in the case of 3xFLAG-HA-Ezl1<sup>H526A</sup>. Top panel: Silver-stained gel of pulled-down proteins used for *in vitro* histone methyltransferase assays (Fig. 2d-e and panel d). Bottom panel: Western-blot analysis with anti-FLAG antibodies. **d** Immunoprecipitates from panel c were used for *in vitro* histone methyltransferase assays with recombinant histone octamers assembled with *Xenopus* H3 or tetramers assembled with *Parametrium* H3 as substrates. The graphs show relative quantification of histone methyltransferase signals analyzed by scintillation counting after SDS-PAGE. Circles indicate the individual data points. Horizontal bars represent the mean of two biological replicates. More residual activity appears detectable with the *Parametrium* double mutant H3 (lane 9) than with the *Xenopus* double mutant H3 (lane 5). This difference may be due to the fact that the mutants are not exactly the same (K9A/K27A for *Xenopus* and K9R/K27R for *Parametrium*) or to differences in the N-terminal amino acid sequence between the two proteins (see panel e), or both. **e** Sequence alignment of the N-terminal *Xenopus* and *Parametrium* H3 (H3P1) proteins. Note the insertion of one (N) residue at position 14 in the *Parametrium* H3 sequence, resulting in one amino acid gap between positions in the *Xenopus* and *Parametrium* sequences (Table 1 and Supplementary Data 1). For simplicity, K24 and K28 in the *Parametrium* H3 sequence are referred to as K23 and K27, respectively. According to quantitative label free mass spectrometry analysis (Fig. 2e, Table 1 and Supplementary Data 1), K9 and K27 (highlighted in yellow) are methylated in an Ezl1-dependent manner. Source data are provided as a Source Data file.

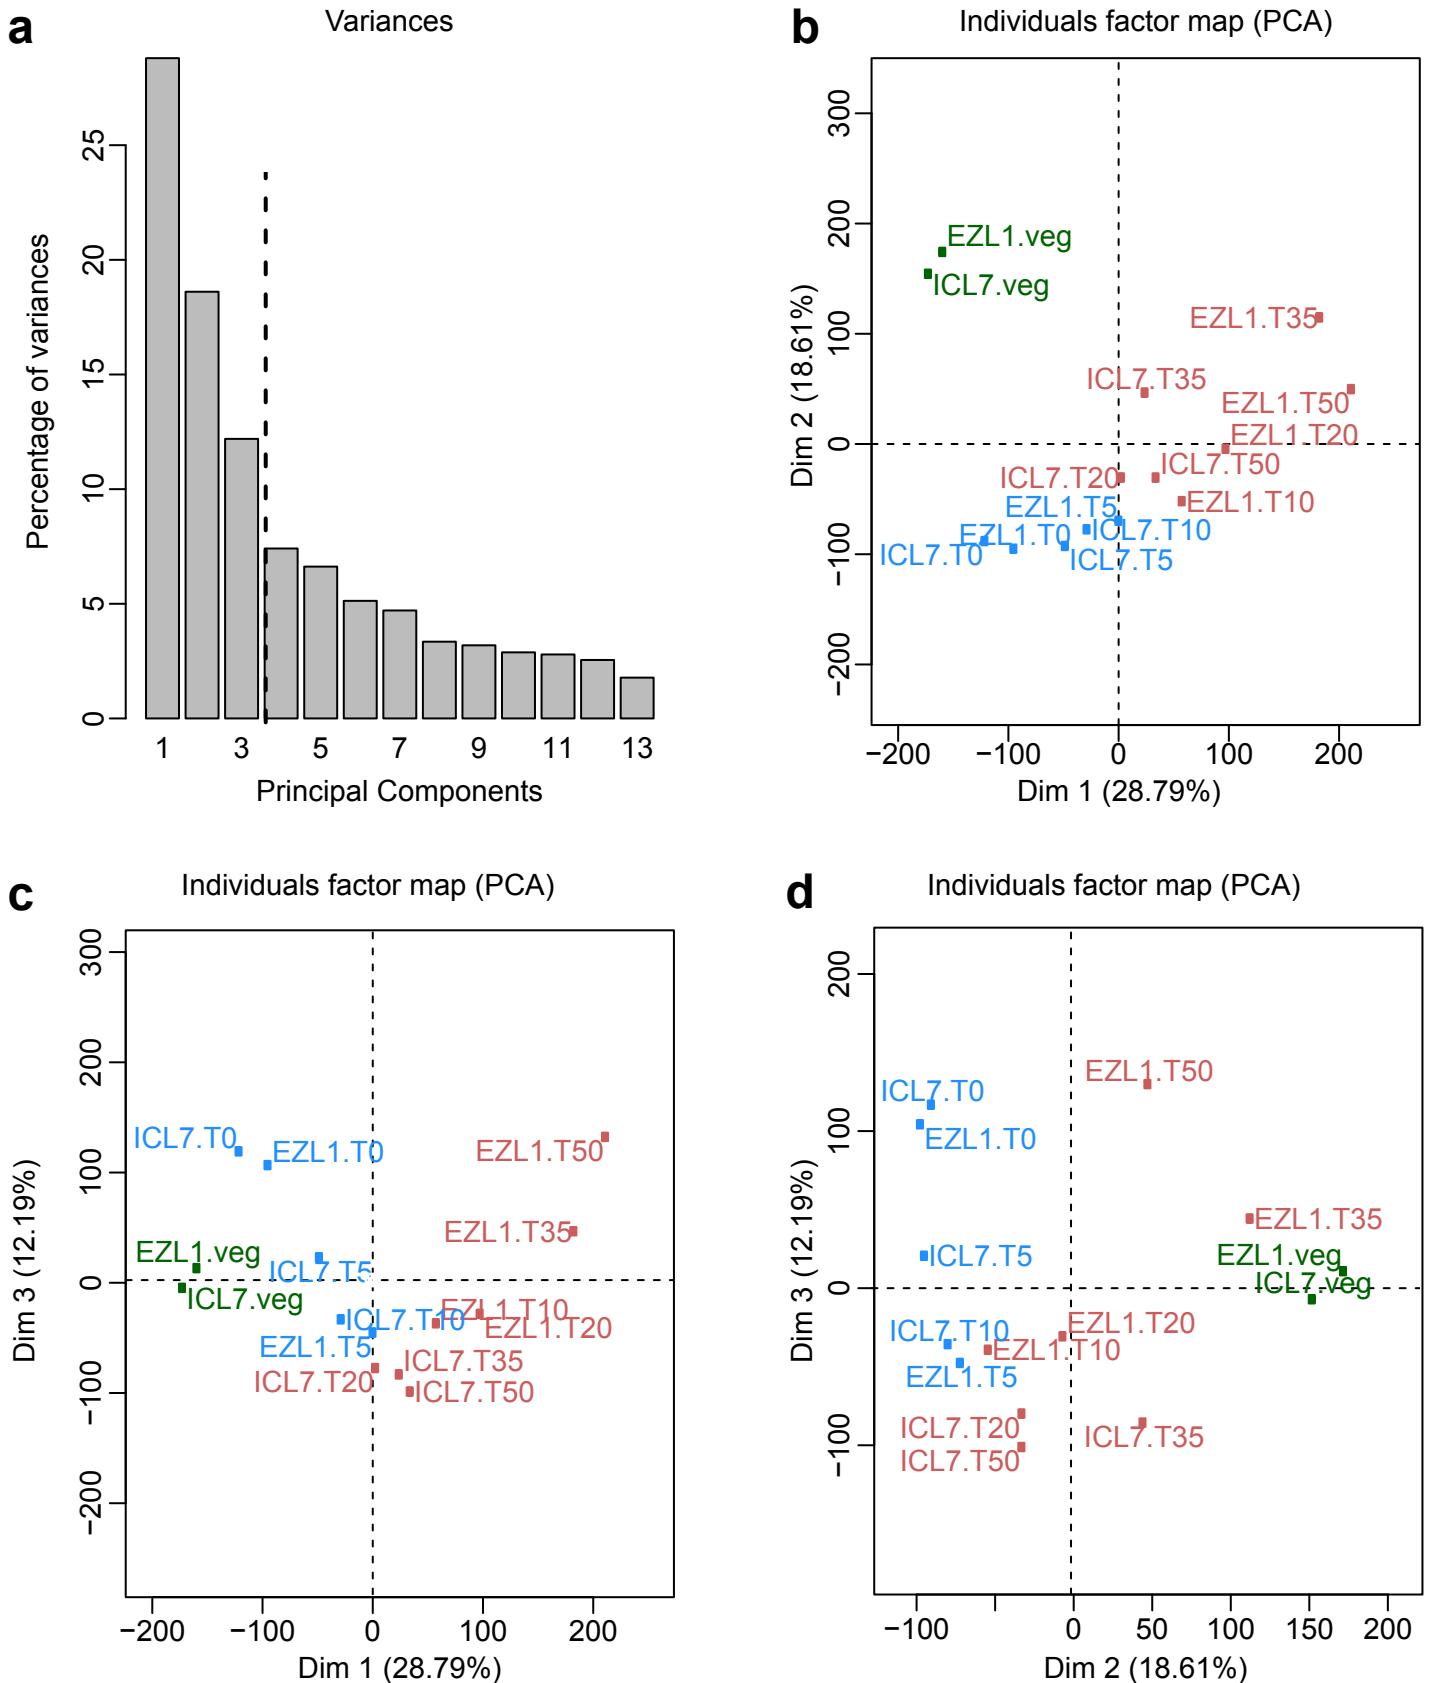

**Supplementary Figure 3. Principle Component Analysis (PCA) clustering of RNA-seq samples.**

Normalized fragment counts for all elements and all samples were analyzed by PCA. This technique finds coordinate systems that explain the variance in the data. **a** Barplot showing the variability accounted for by the PCA components. **b** Biplot representing the RNA-seq samples on the coordinate system defined by PCA components 1 and 2, representing 47% of global variance, that separates the samples into 3 groups, corresponding to vegetative stage (ICL7 and EZL1 vegetative samples, in green), Early developmental stage (ICL7: T0, T5, T10; EZL1: T0, T5 samples, in blue) and Late developmental stage (ICL7: T20, T35, T50 and EZL1: T10, T20, T35, T50). This is the sample grouping used for all analyses. **c** Biplot representing the samples on the coordinate system defined by PCA components 1 and 3. **d** Biplot representing the samples on the coordinate system defined by PCA components 2 and 3.

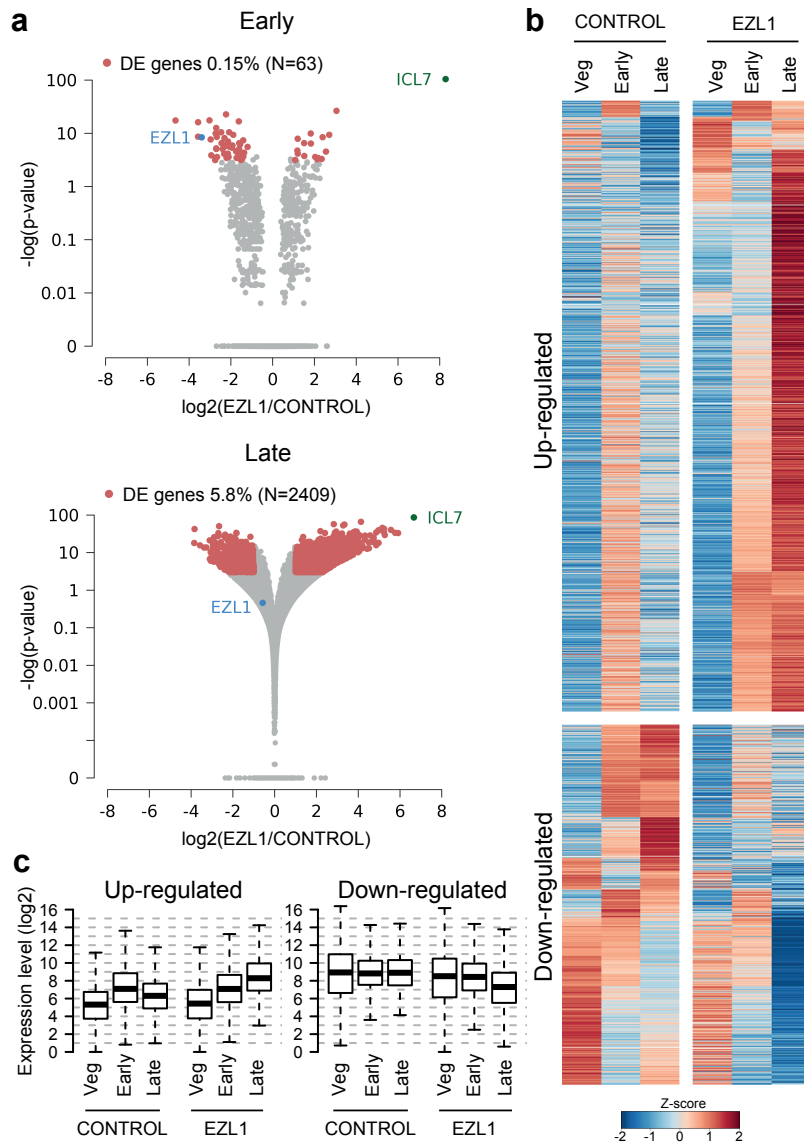

**Supplementary Figure 4. Gene expression upon *EZL1* RNAi.**

**a** Volcano plot representation of up- and down-regulated genes between *EZL1* and *ICL7* (control) RNAi for Early (top) and Late (bottom) developmental stages as measured by RNA-seq. Red dots indicate significantly misregulated genes between the two conditions (fold change >2 and p-value <0.05): 63 genes at Early stage (0.15% of all genes) and 2,409 genes at Late stage (5.8% of all genes). At the Early stage, 0.04% of all genes are up-regulated and 0.11% are down-regulated. At the Late stage, 3.7% of all genes are up-regulated and 2.1% down-regulated. The *ICL7* gene and the *EZL1* gene are shown in green and blue, respectively. They attest to knockdown efficiency: *EZL1* is much less expressed in the *EZL1* RNAi than in the *ICL7* control RNAi at the Early stage, when *EZL1* expression peaks. Conversely, the constitutively expressed gene *ICL7* is much less expressed in the control (*ICL7*) RNAi than in *EZL1* RNAi at both the Early and Late stages. **b** Heatmap ordered by hierarchical clustering of *EZL1* and *ICL7* developmental stages (see Methods) of up- and down-regulated genes between *EZL1* and *ICL7* (control) RNAi as measured by RNA-seq. Each row represents a gene and each column a developmental stage (Veg, vegetative; Early; Late) for *EZL1* (left) and *ICL7* (right) RNAi. The Z-score color, from dark blue to dark red, represents the number of standard deviations from the mean expression across all 6 conditions. **c** Boxplot representation of normalized expression levels for up-regulated and down-regulated genes presented in the panel b.

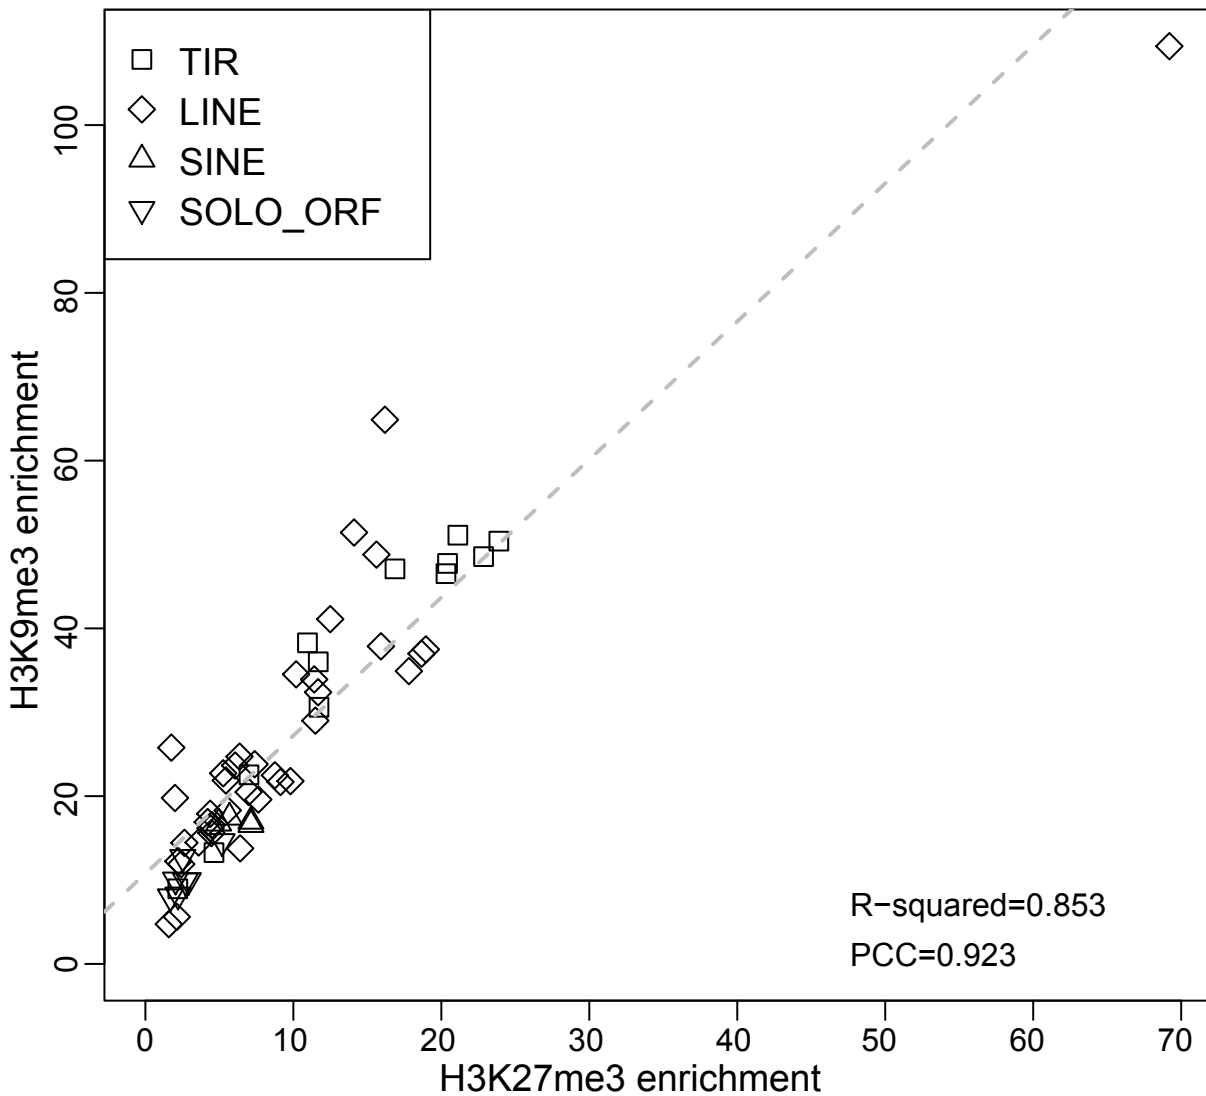

**Supplementary Figure 5. Correlation of enrichment for H3K27me3 and H3K9me3 on TE families.** Pearson correlation coefficient (PCC) and  $R^2$  between H3K9me3 and H3K27me3 enrichment relative to input for the 61 TE families presented in Fig. 5c are indicated.

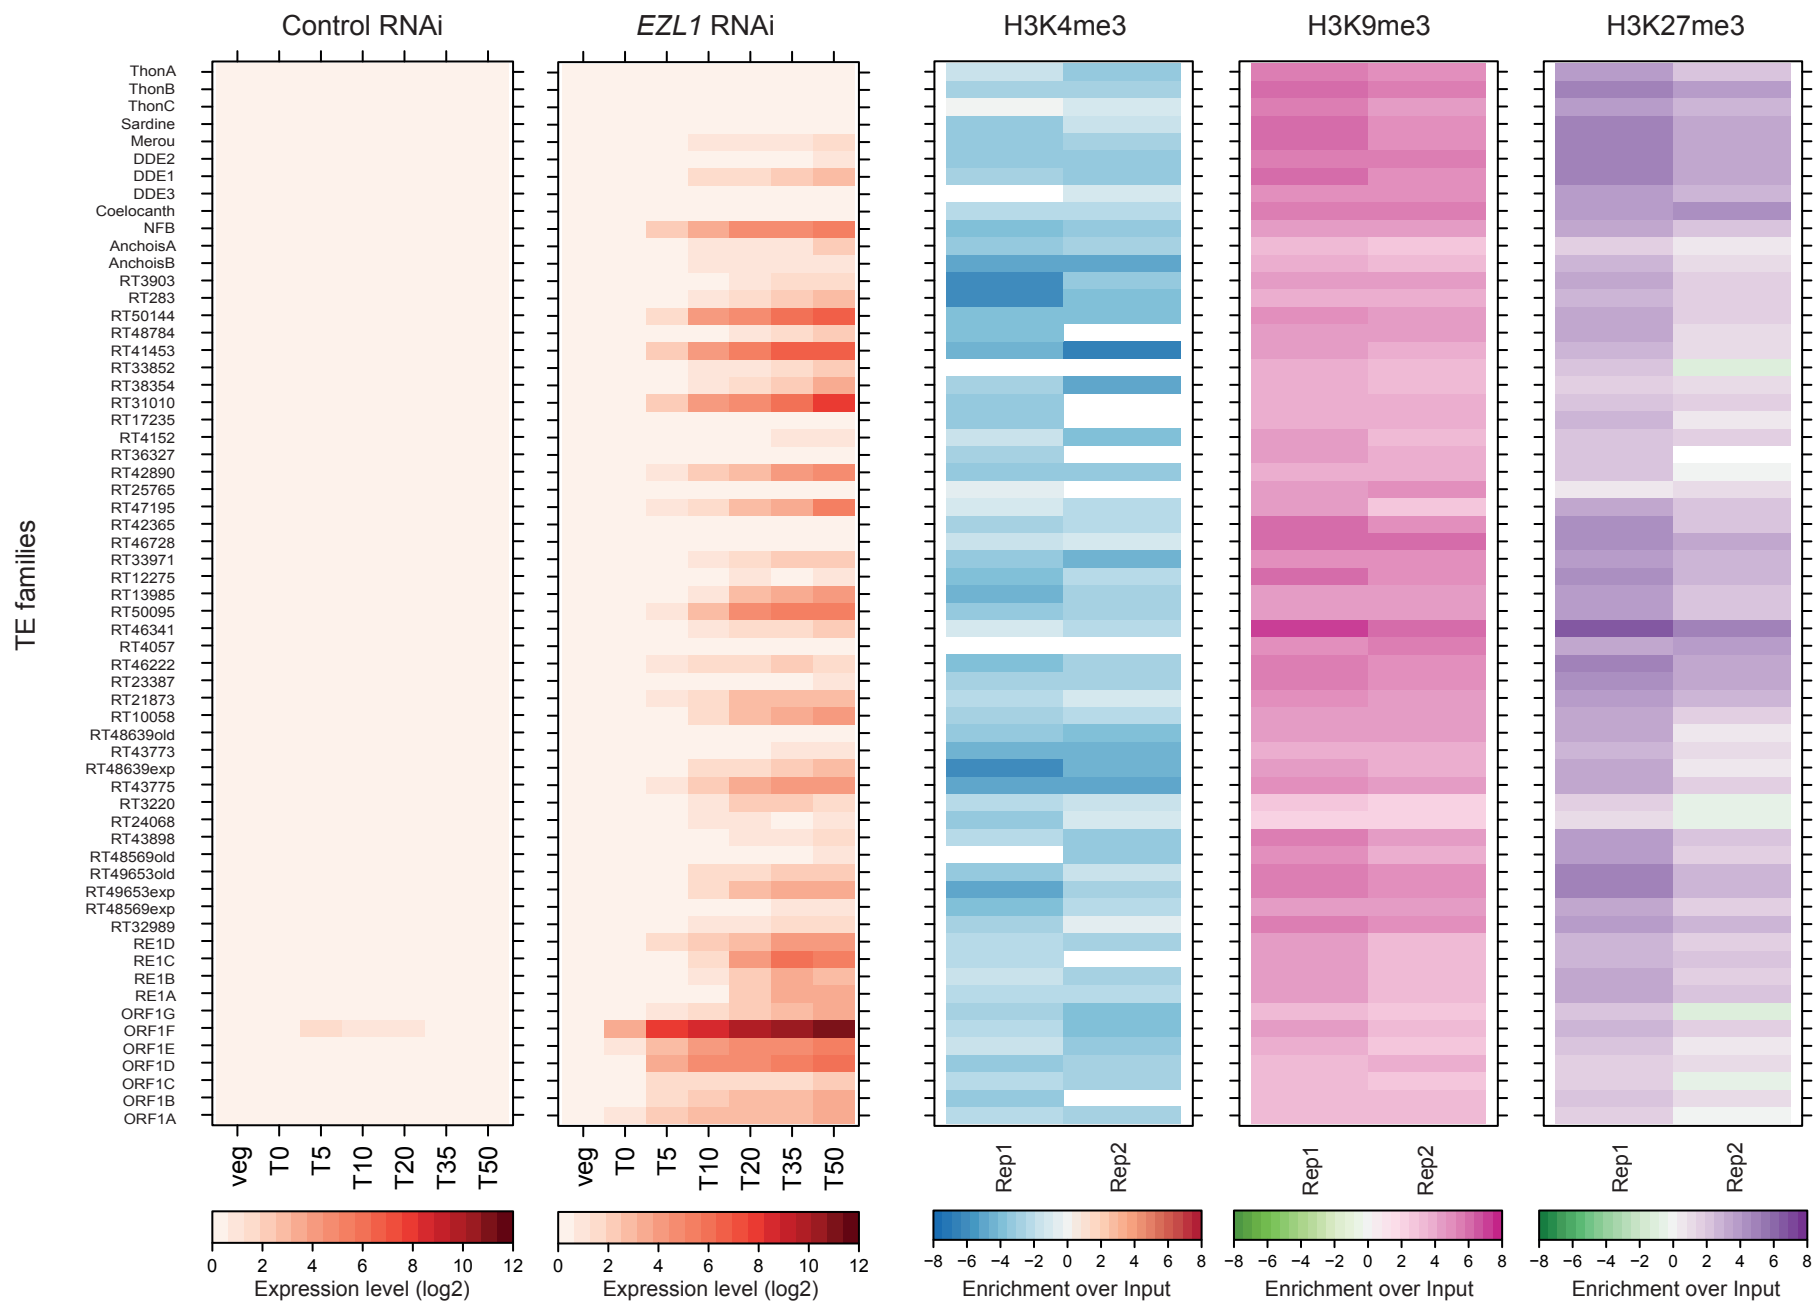

**Supplementary Figure 6. Heatmap of RNA levels and histone marks enrichment for 61 TE families.**

(Left panels) Heatmaps of RNA expression levels for 61 TE families are shown at different time points during development upon control (ICL7) and *EZL1* RNAi. Each row represents a TE family and each column a time point during an autogamy time course (see Supplementary Fig. 3). (Right panels) Heatmaps of H3K4me3, H3K9me3 and H3K27me3 enrichment over input for the 61 TE families, for each biological replicate presented in Fig. 5c.

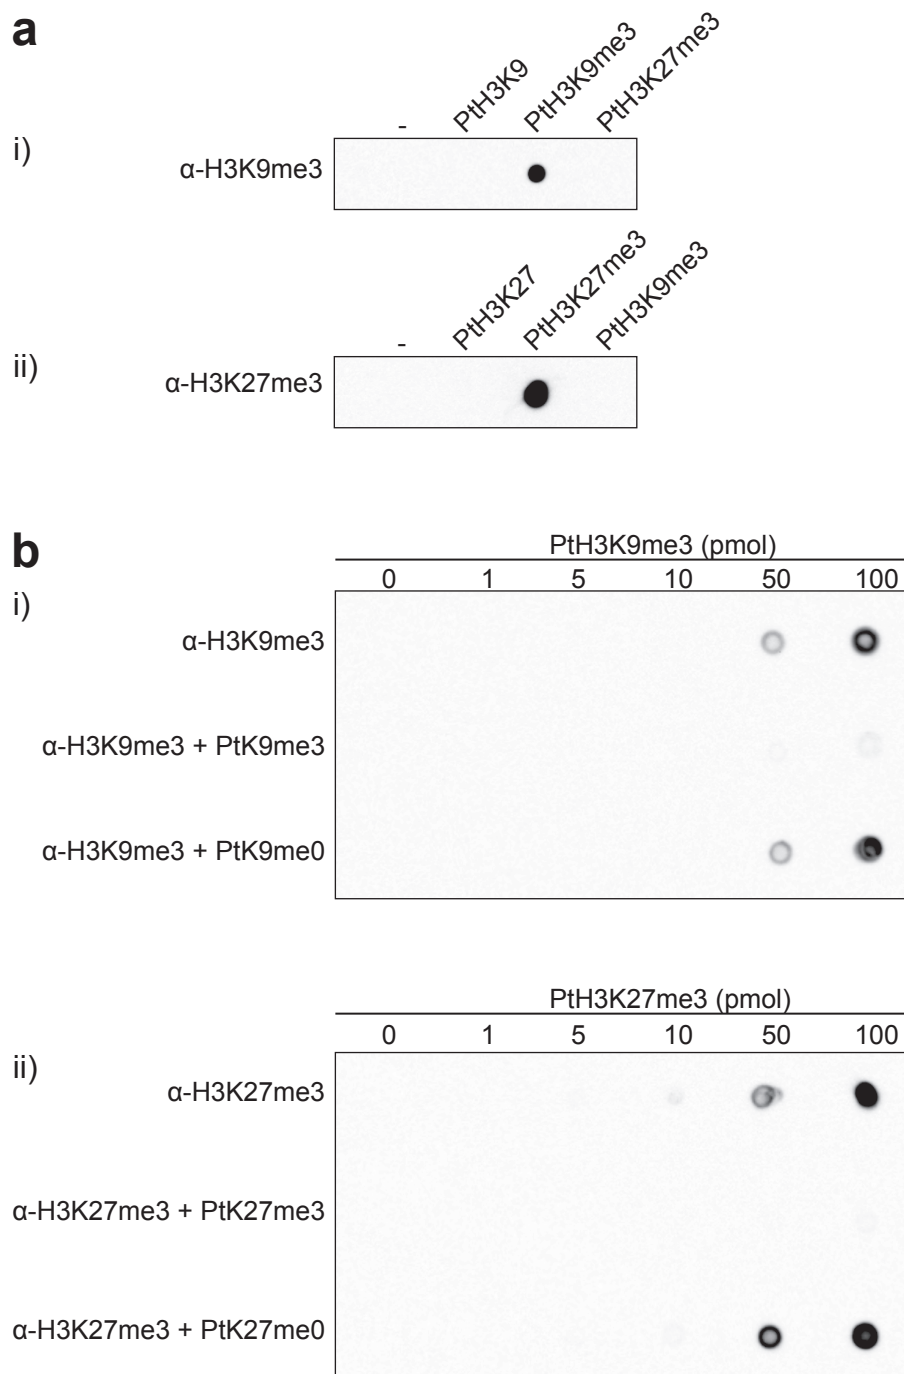

**Supplementary Figure 7. Specificity of H3K9me3 and H3K27me3 antibodies.**

**a** Dot blot assay using *Paramecium tetraurelia* H3 peptides. 100 ng of each of the indicated peptides was spotted on the membrane. No peptide was spotted for the negative control (-). i) Hybridization with the H3K9me3 polyclonal antibodies showed specific reactivity with tri-methyl K9 (PtH3K9me3: CKQTARK(me3)STAGN) but not against the unmodified peptide nor the tri-methyl K27 (PtH3K27me3: TKAARK(Me3)TAP). ii) Hybridization with the H3K27me3 polyclonal antibodies showed specific reactivity with tri-methyl K27 but not against the unmodified peptide nor the tri-methyl K9. **b** Competition assay. 0 to 100 pmol of *Paramecium* H3K9me3 (i) or H3K27me3 (ii) peptides were spotted and probed with the H3K9me3 (i) or H3K27me3 (ii) antibodies alone or in presence of a 100-fold molar excess of the indicated peptides. Pre-absorption with the PtH3K9me3 (i) or PtH3K27me3 (ii) peptides dramatically reduces the signal, while pre-absorption with the un-methylated peptide has no effect. Source data are provided as a Source Data file.



| Stage        | Label    | ENA Accession | Number of reads | Number of mapped reads on MAC | %  | Number of mapped reads on MIC | %  |
|--------------|----------|---------------|-----------------|-------------------------------|----|-------------------------------|----|
| <b>VEG</b>   | EZL1.veg | ERX2078722    | 49394256        | 46878066                      | 95 | 113835                        | 0  |
| <b>EARLY</b> | EZL1.T0  | ERX2078723    | 108981514       | 102588411                     | 94 | 467396                        | 0  |
|              | EZL1.T5  | ERX2078724    | 141404920       | 118242226                     | 84 | 749587                        | 1  |
|              | EZL1.T10 | ERX2078725    | 57380782        | 55043791                      | 96 | 592750                        | 1  |
| <b>LATE</b>  | EZL1.T20 | ERX2078726    | 59605368        | 55678537                      | 93 | 2041696                       | 3  |
|              | EZL1.T35 | ERX2078727    | 24060916        | 19693556                      | 82 | 3292949                       | 14 |
|              | EZL1.T50 | ERX2078728    | 64896124        | 52192723                      | 80 | 9486842                       | 15 |
| <b>VEG</b>   | ICL7.veg | ERX2078729    | 92371700        | 87012622                      | 94 | 239508                        | 0  |
| <b>EARLY</b> | ICL7.T0  | ERX2078730    | 85117070        | 80131612                      | 94 | 341632                        | 0  |
|              | ICL7.T5  | ERX2078731    | 89067894        | 84074611                      | 94 | 388490                        | 0  |
| <b>LATE</b>  | ICL7.T10 | ERX2078732    | 83730830        | 78744105                      | 94 | 376792                        | 0  |
|              | ICL7.T20 | ERX2078733    | 89608604        | 83504251                      | 93 | 326938                        | 0  |
|              | ICL7.T35 | ERX2078734    | 47982586        | 45581393                      | 95 | 152053                        | 0  |
|              | ICL7.T50 | ERX2078735    | 79970902        | 73891476                      | 92 | 301197                        | 0  |

**Supplementary Table 1. Description of RNA-seq data deposited in the European Nucleotide Archive.**

The columns provide the stage, the sample label, the ENA accession, the total number of reads, the number of reads that were mapped to the MAC reference genome and the number of reads that did not map to the MAC reference that did map to the MIC assembly. The percentage of mapped reads is with respect to the total number of reads in each sample.

|                               | All annotated genes |       | Differentially Expressed genes |       |      |             | Up-regulated genes |       |      |             | Down-regulated genes |       |      |             |
|-------------------------------|---------------------|-------|--------------------------------|-------|------|-------------|--------------------|-------|------|-------------|----------------------|-------|------|-------------|
|                               | Number              | Perc. | Number                         | Perc. | Chi2 | Chi2 Pvalue | Number             | Perc. | Chi2 | Chi2 Pvalue | Number               | Perc. | Chi2 | Chi2 Pvalue |
| <b>Number of coding genes</b> | 40460               |       | 2375                           |       |      |             | 1505               |       |      |             | 870                  |       |      |             |
| <b>Autogamy coding genes</b>  | 17190               | 42.5% | 1519                           | 64.0% | 420  | 1.98e-93    | 926                | 61.5% | 214  | 1.47e-48    | 593                  | 68.2% | 229  | 9.75e-52    |
| <i>Intermediate peak</i>      | 2037                | 5.0%  | 451                            | 19.0% | 799  | 1.14e-175   | 438                | 29.1% | 1515 | <1e-324     | 13                   | 1.5%  | 23   | 1.95e-06    |
| <i>Late induction</i>         | 3741                | 9.2%  | 359                            | 15.1% | 89   | 3.4e-21     | 276                | 18.3% | 139  | 5.4e-32     | 83                   | 9.5%  | 0.09 | 0.767       |
| <i>Early peak</i>             | 1974                | 4.9%  | 136                            | 5.7%  | 3    | 0.0636      | 119                | 7.9%  | 28   | 1.17e-07    | 17                   | 2.0%  | 16   | 6.71e-05    |
| <i>Late peak</i>              | 468                 | 1.2%  | 67                             | 2.8%  | 50   | 1.26e-12    | 24                 | 1.6%  | 2    | 0.121       | 43                   | 4.9%  | 100  | 1.55e-23    |
| <i>Early repression</i>       | 4536                | 11.2% | 259                            | 10.9% | 0.2  | 0.646       | 41                 | 2.7%  | 108  | 3.37e-25    | 218                  | 25.1% | 160  | 9.21e-37    |
| <i>Late repression</i>        | 4434                | 11.0% | 247                            | 10.4% | 0.7  | 0.396       | 28                 | 1.9%  | 126  | 2.5e-29     | 219                  | 25.2% | 172  | 2.42e-39    |

**Supplementary Table 2. DE genes upon *EZL1* RNAi are enriched in autogamy genes.**

Six gene expression profiles during autogamy (Intermediate peak, Late induction, Early peak, Late peak, Early repression and Late repression) were defined in Arnaiz et al. 2017, involving 42% (N=17190) of all annotated coding genes (N=40460). The table presents a comparison of percentages of three datasets of DE genes upon *EZL1* knockdown (DE expressed genes, Up-regulated DE genes, Down-regulated DE genes) with the percentages for all annotated coding genes in each expression profile group. The significance is tested using a Chi-square test. The Chi2 and P-value statistics are shown for each comparison. The DE genes upon *EZL1* knockdown are enriched significantly in autogamy genes and more specifically in genes from the Intermediate peak cluster.

|       | <i>EZL1</i> RNAi | control RNAi ( <i>ICL7</i> ) | Fold-change |
|-------|------------------|------------------------------|-------------|
| TE    | 311.4            | 1.1                          | 282.52      |
| genes | 1715.9           | 355.5                        | 4.83        |

**Supplementary Table 3. Comparison of aggregate fold-change in differential expression (DE) for TE and for genes.**

The total normalized RNA-Seq read counts per Kb for all Late stage DE TE and for all Late stage up-regulated DE genes were calculated (first 2 columns of table). The ratio of *EZL1* RNAi/control gives the average fold-change in the 3<sup>rd</sup> column, showing that TE de-repression is much more dramatic than gene DE.

| Name           | Sequence (5' to 3')     | Locus (ID)                                                                                    |
|----------------|-------------------------|-----------------------------------------------------------------------------------------------|
| Actin_qPCR_for | TGAAGCTCCAATGAATCCAA    | Actin 1-1<br>(PTET.51.1.G0130204)                                                             |
| Actin_qPCR-rev | TCCTGAAGCATAGAGTGAGA    | Actin 1-1<br>(PTET.51.1.G0130204)                                                             |
| GAPDH_qPCR_F2  | ATTTTGGTATTGTTGAGGGT    | GAPDH<br>(PTET.51.1.G0380195)                                                                 |
| GAPDH_qPCR_R2  | CTCCAGTCTTTTCCACCTTT    | GAPDH<br>(PTET.51.1.G0380195)                                                                 |
| Oligo #751     | CTTAGTGGGGTAGAATGAGCA   | EE PPase<br>(PTET.51.1.G1020193)                                                              |
| Oligo #752     | GACTTCTGCTTTCTTTTCTGCA  | EE PPase<br>(PTET.51.1.G1020193)                                                              |
| Oligo #753     | GGAGAGGGAAAGATAAGAGT    | ST PPase<br>(PTET.51.1.G1240023)                                                              |
| Oligo #754     | CCACTCCTTGAATTTGAGGA    | ST PPase<br>(PTET.51.1.G1240023)                                                              |
| Oligo #759     | GAAGTAGGTATTATCGTGCC    | ST Kinase<br>(PTET.51.1.G1270115)                                                             |
| Oligo #760     | ACCATGTAAACAATTCAAGCA   | ST Kinase<br>(PTET.51.1.G1270115)                                                             |
| Oligo #769     | AGAGAGAGACTTCGTGATGA    | Helicase<br>(PTET.51.1.G1070046)                                                              |
| Oligo #770     | CAACTTGGGCATGTCAAAAT    | Helicase<br>(PTET.51.1.G1070046)                                                              |
| Anchois.173_F2 | TTCCAAGCTGATTTCGATTATTA | Anchois B<br>(IESPGM.PTET51.1.173.70900)                                                      |
| Anchois.173_R2 | ACTTCTTGTTCATTGTTAGACT  | Anchois B<br>(IESPGM.PTET51.1.173.70900)                                                      |
| IESA1835_F2    | GTGGATGGACTGGAACCTAA    | IES 51A1835<br>(IESPGM.PTET51.1.106.284157)                                                   |
| IESA1835_R2    | ACAATCCATCTATAAATGAGTT  | IES 51A1835<br>(IESPGM.PTET51.1.106.284157)                                                   |
| Oligo #727     | ACAAACGAACGAACAGATTG    | RT50144<br>(ms5583_NODE_2217_length_6579_cov_30.856514_RT50144_Group5_non-LTR:Class:LINE)     |
| Oligo #728     | CTGAGATGGCATAACTCCTT    | RT50144<br>(ms5583_NODE_2217_length_6579_cov_30.856514_RT50144_Group5_non-LTR:Class:LINE)     |
| Oligo #767     | TTATTATGAGGGTTGGCGTC    | RT48784-1<br>(ms2529_NODE_45329_length_35351_cov_22.766909_RT48784_Group5_non-LTR:Class:LINE) |
| Oligo #768     | TAACTACACGACACCAGATC    | RT48784-1<br>(ms2529_NODE_45329_length_35351_cov_22.766909_RT48784_Group5_non-LTR:Class:LINE) |
| Oligo #739     | GTAGCTTTAATGAACGCAGG    | RT48784-2<br>(ms4165_NODE_5853_length_16457_cov_20.256548_RT48784_Group5_non-LTR:Class:LINE)  |
| Oligo #740     | TATAGAACCGCCACAATCAG    | RT48784-2<br>(ms4165_NODE_5853_length_16457_cov_20.256548_RT48784_Group5_non-LTR:Class:LINE)  |
| Oligo #551     | ACAAGATTGACCAGGACTTATT  | RT31010<br>(ms4410_NODE_3768_length_13900_cov_21.582806_RT31010_Group4_non-LTR:Class:LINE)    |
| Oligo #552     | ATATCATTCACTCCTGCAATCT  | RT31010<br>(ms4410_NODE_3768_length_13900_cov_21.582806_RT31010_Group4_non-LTR:Class:LINE)    |

|                   |                          |                                                                                                 |
|-------------------|--------------------------|-------------------------------------------------------------------------------------------------|
| <b>Oligo #559</b> | TTAATTGAAGGCGAAGAAAGAC   | RT42890<br>(ms1831_NODE_10132_length_49470_cov_21.140064_RT42890_Group4_non-LTR:Class:LINE)     |
| <b>Oligo #560</b> | ACCATTCAATATCTTCTCCCTC   | RT42890<br>(ms1831_NODE_10132_length_49470_cov_21.140064_RT42890_Group4_non-LTR:Class:LINE)     |
| <b>Oligo #569</b> | TCGAAGTAGATTATGGCTGAAA   | RT25765<br>(ms1973_NODE_322_length_47186_cov_49.739605_RT25765_Group4_non-LTR:Class:LINE)       |
| <b>Oligo #570</b> | CTTTCATCCTCCTCACTTAACT   | RT25765<br>(ms1973_NODE_322_length_47186_cov_49.739605_RT25765_Group4_non-LTR:Class:LINE)       |
| <b>Oligo #563</b> | CAATTCCACCCAATATCAAACA   | RT12275<br>(ms1017_NODE_8426_length_83307_cov_43.323395_RT12275_Group3_non-LTR:Class:LINE)      |
| <b>Oligo #564</b> | ATTAAAGGATGGTCAGAAAGCT   | RT12275<br>(ms1017_NODE_8426_length_83307_cov_43.323395_RT12275_Group3_non-LTR:Class:LINE)      |
| <b>Oligo #735</b> | CCCAAGCAAATCTGAAACA      | RT43773<br>(ms1391_NODE_2993_length_64210_cov_44.286140_RT43773_Group2_non-LTR:Class:LINE)      |
| <b>Oligo #736</b> | CATTTTGGTGAGCACAGTTT     | RT43773<br>(ms1391_NODE_2993_length_64210_cov_44.286140_RT43773_Group2_non-LTR:Class:LINE)      |
| <b>Oligo #761</b> | GACTATGCTGACGATCTTGT     | RT48639-1<br>(ms6074_NODE_8863_length_4403_cov_18.113333_RT48639old_Group2_non-LTR:Class:LINE)  |
| <b>Oligo #762</b> | TTCTGATTGCCATAACACCA     | RT48639-1<br>(ms6074_NODE_8863_length_4403_cov_18.113333_RT48639old_Group2_non-LTR:Class:LINE)  |
| <b>Oligo #723</b> | ATCATCTTCCCTCACATCG      | RT48639-2<br>(ms4963_NODE_3562_length_10237_cov_31.527792_RT48639exp_Group2_non-LTR:Class:LINE) |
| <b>Oligo #724</b> | AGATTTCACGCTTCAGTTCT     | RT48639-2<br>(ms4963_NODE_3562_length_10237_cov_31.527792_RT48639exp_Group2_non-LTR:Class:LINE) |
| <b>Oligo #731</b> | TCCTCCATAAAACCAAACACT    | RT32989<br>(ms2470_NODE_50533_length_36815_cov_24.476028_RT32989_Group1_non-LTR:Class:LINE)     |
| <b>Oligo #732</b> | ATTCTTCGCCTTTGAAATG      | RT32989<br>(ms2470_NODE_50533_length_36815_cov_24.476028_RT32989_Group1_non-LTR:Class:LINE)     |
| <b>Oligo #577</b> | CCATGTTTTCTCTATTTGGTCTAA | PTET.51.1.G1740048                                                                              |
| <b>Oligo #578</b> | GTAGACAACACAGAAGTAATTTGA | PTET.51.1.G1740048                                                                              |
| <b>Oligo #571</b> | CTTTTCACTGGTGTGTTCC      | GFP                                                                                             |
| <b>Oligo #572</b> | TCCATAAGTTGCATCACCTT     | GFP                                                                                             |

**Supplementary Table 4. List of qPCR primers used in this study.**

| Sample   | Replicate | ENA Accession | Number of reads | Number of filtered reads* | Number of mapped reads |      | Number of mapped reads |      |
|----------|-----------|---------------|-----------------|---------------------------|------------------------|------|------------------------|------|
|          |           |               |                 |                           | on MAC**               | %    | on MIC**               | %    |
| Input    | 1         | ERS3000371    | 9430818         | 7856786                   | 6929340                | 88.2 | 7015422                | 89.3 |
| H3K27me3 | 1         | ERS3000373    | 6028738         | 4932700                   | 1465830                | 29.7 | 1772716                | 35.9 |
| H3K4me3  | 1         | ERS3000377    | 10490550        | 8039260                   | 4602414                | 57.2 | 4466804                | 55.6 |
| H3K9me3  | 1         | ERS3000375    | 11608410        | 8633428                   | 3027432                | 35.1 | 5857844                | 67.9 |
| Input    | 2         | ERS3000372    | 12244786        | 10073580                  | 9109940                | 90.4 | 9077564                | 90.1 |
| H3K27me3 | 2         | ERS3000374    | 9349800         | 5337322                   | 1549350                | 29.0 | 1652260                | 31.0 |
| H3K4me3  | 2         | ERS3000378    | 11281436        | 8840084                   | 5129996                | 58.0 | 4979036                | 56.3 |
| H3K9me3  | 2         | ERS3000376    | 18933858        | 14624882                  | 8367024                | 57.2 | 12886074               | 88.1 |

\* Min sequencing quality 20 and no PCR duplicates

\*\* High quality BOWTIE2 mapping (-q 20)

#### Supplementary Table 5. Description of ChIP-seq data deposited in the European Nucleotide Archive.

The columns provide the sample label, the ENA accession, the total number of reads, the number of filtered reads, the number of filtered reads that were mapped to the MAC reference genome and the number of reads that were mapped to the MIC reference genome assembly. The percentage of mapped reads is with respect to the number of filtered reads in each sample.
