# Supplementary material for: The Polycomb protein Ezl1 mediates H3K9 and H3K27 methylation to repress transposable elements in Paramecium
Source: PubMed Central journal article supplement (PMC6586856; doi:10.1038/s41467-019-10648-5), 2019-06-20
Supplement: 41467_2019_10648_MOESM3_ESM.pdf [file 41467_2019_10648_MOESM3_ESM.pdf]

## Description of Additional Supplementary Files

**File name:** Supplementary Data 1

**Description:** Mass spectrometry determination of differentially modified histone H3 peptides in purified *Paramecium* histone H3 samples obtained from *in vitro* methylation reactions with Ezl1<sup>wt</sup> and Ezl1<sup>H526A</sup> proteins.

**File name:** Supplementary Data 2

**Description:** List of DE genes upon *EZL1* RNAi.
